# Supplementary material
Source: publisher figshare collection journal article supplement (https://asha.figshare.com/articles/dataset/_/5176942)
Supplement: Supplementary file 1 [file 1]

**Supplemental Material S7.** Descriptive statistics in mean (and standard deviation): occurrence of individual tense markers.

| <b>Tense marker</b>  | <b>Semester 1:<br/>Fall</b> | <b>Semester 2:<br/>Spring</b> | <b>Semester 3:<br/>Fall</b> | <b>Semester 4:<br/>Spring</b> |
|----------------------|-----------------------------|-------------------------------|-----------------------------|-------------------------------|
| Regular past tense   |                             |                               |                             |                               |
| Correct              | 2.33 (2.94)                 | 3.36 (3.09)                   | 6.50 (4.54)                 | 7.62 (4.30)                   |
| Omission             | 2.73 (2.33)                 | 1.94 (2.19)                   | 2.36 (3.02)                 | 1.76 (2.01)                   |
| Incorrect            | N/A                         | N/A                           | N/A                         | N/A                           |
| OCs                  | 5.07 (3.55)                 | 5.31 (3.52)                   | 8.86 (4.13)                 | 9.38 (3.62)                   |
| Irregular past tense |                             |                               |                             |                               |
| Correct              | 4.30 (2.76)                 | 5.81 (4.47)                   | 10.0 (5.12)                 | 10.62 (4.94)                  |
| Omission             | 2.50 (2.33)                 | 2.25 (2.27)                   | 3.11 (2.74)                 | 1.84 (2.01)                   |
| Incorrect            | 0.53 (0.94)                 | 0.47 (0.97)                   | 0.94 (1.47)                 | 1.59 (2.19)                   |
| OCs                  | 7.33 (3.80)                 | 8.53 (4.79)                   | 14.06 (5.88)                | 14.05 (5.87)                  |
| Copula BE            |                             |                               |                             |                               |
| Correct              | 4.33 (3.40)                 | 4.56 (3.18)                   | 6.14 (4.33)                 | 6.19 (4.52)                   |
| Omission             | 0.37 (0.81)                 | 0.36 (0.68)                   | 0.22 (0.49)                 | 0.14 (0.42)                   |
| Incorrect            | 0.30 (0.53)                 | 0.25 (0.69)                   | 0.19 (0.52)                 | 0.38 (0.64)                   |
| OCs                  | 5.00 (4.07)                 | 5.17 (3.50)                   | 6.56 (4.54)                 | 6.70 (4.43)                   |
| Auxiliary BE         |                             |                               |                             |                               |
| Correct              | 2.50 (2.66)                 | 3.61 (2.95)                   | 6.50 (4.86)                 | 5.22 (4.23)                   |
| Omission             | 0.70 (1.30)                 | 0.33 (0.79)                   | 0.22 (0.42)                 | 0.22 (0.53)                   |
| Incorrect            | 0.33 (0.99)                 | 0.19 (0.40)                   | 0.14 (0.35)                 | 0.16 (0.44)                   |
| OCs                  | 3.53 (3.47)                 | 4.14 (2.98)                   | 6.86 (5.05)                 | 5.59 (4.44)                   |
| Auxiliary DO         |                             |                               |                             |                               |
| Correct              | 0.80 (1.30)                 | 0.78 (1.07)                   | 1.19 (2.18)                 | 1.11 (1.24)                   |
| Omission             | 0.10 (0.40)                 | 0.11 (0.46)                   | 0.08 (0.37)                 | 0.08 (0.28)                   |
| Incorrect            | 0.03 (0.18)                 | 0.03 (0.17)                   | 0.17 (0.70)                 | 0.05 (0.23)                   |
| OCs                  | 0.93 (1.34)                 | 0.92 (1.13)                   | 1.44 (2.40)                 | 1.24 (1.32)                   |
| Present tense        |                             |                               |                             |                               |
| Correct              | 0.33 (0.76)                 | 0.33 (0.68)                   | 0.58 (1.40)                 | 0.19 (0.46)                   |
| Omission             | 0.33 (1.06)                 | 0.28 (0.51)                   | 0.19 (0.71)                 | 0.11 (0.39)                   |
| Incorrect            | N/A                         | N/A                           | N/A                         | N/A                           |
| OCs                  | 0.67 (1.58)                 | 0.61 (0.93)                   | 0.78 (1.9)                  | 0.30 (0.78)                   |

*Note.* OCs = obligatory contexts.
