# Supplementary material
Source: publisher figshare collection journal article supplement (https://asha.figshare.com/articles/dataset/_/5176942)

**Supplemental Material S4.** Empirical growth plot for individual growth trajectories with fitted regression line and individual growth plots with individually fitted regression lines for the finite verb morphology composite (FVMC).

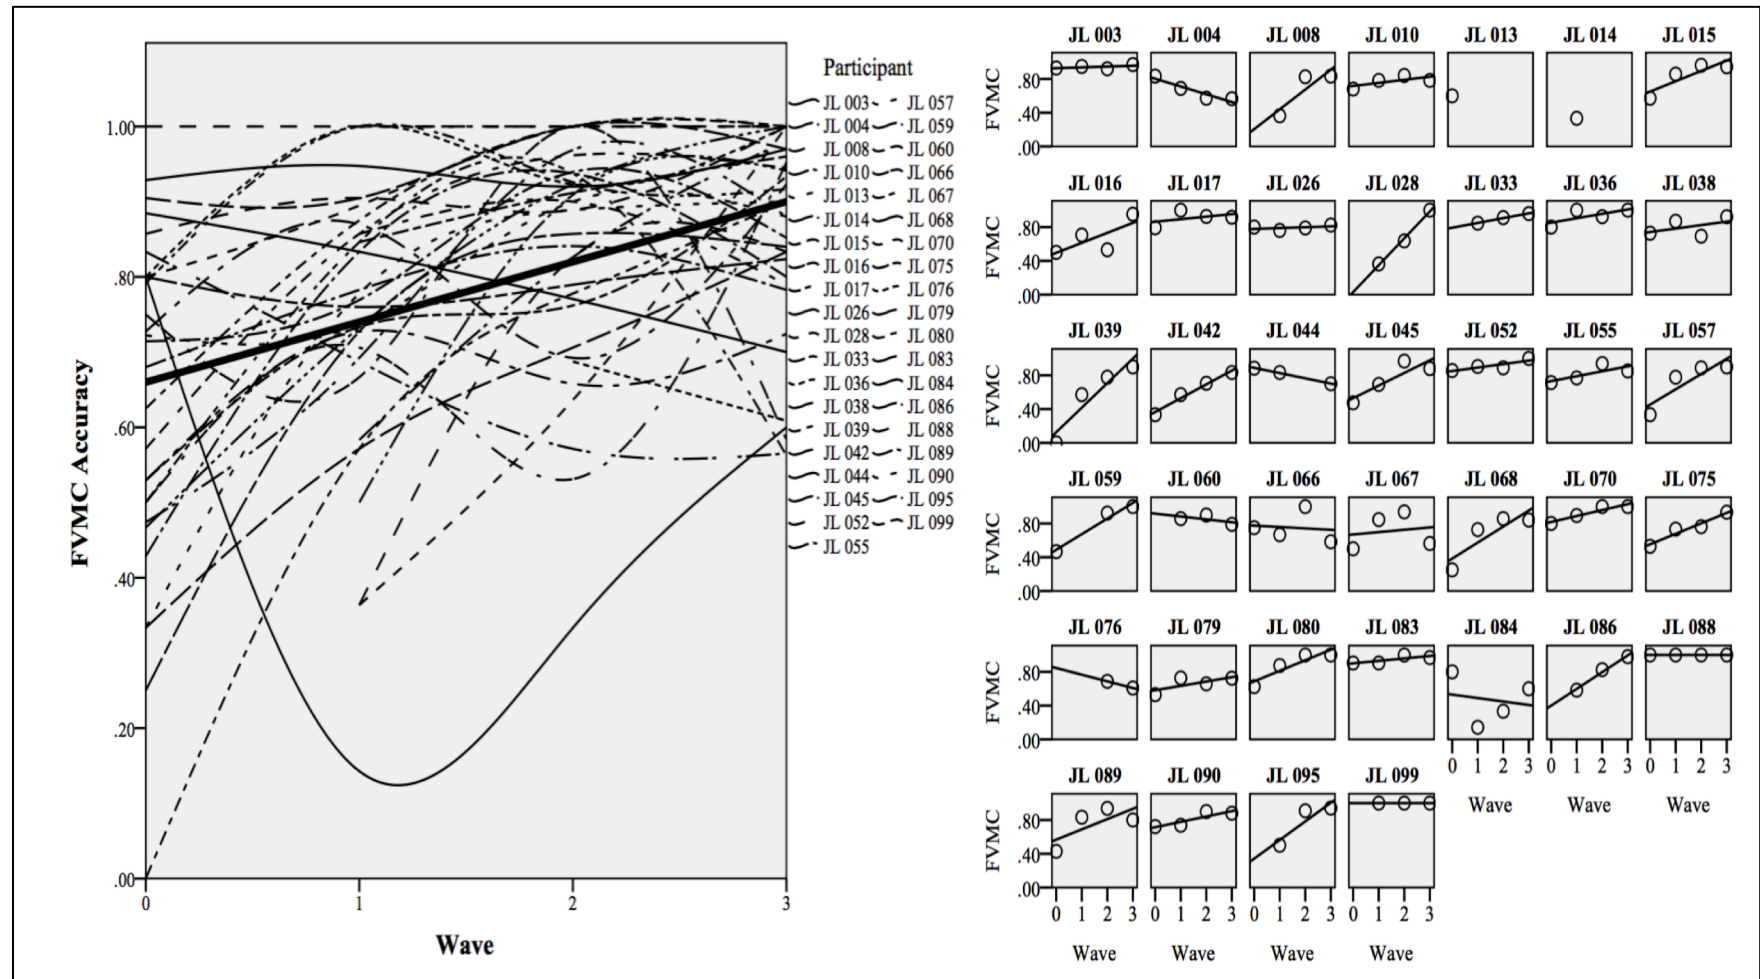

Supplement: Supplementary file 3 [file 1]
