# Supplementary material
Source: publisher figshare collection journal article supplement (https://asha.figshare.com/articles/dataset/_/5176942)
Supplement: Supplementary file 5 [file 1]

**Supplemental Material S3.** Growth curve model parameter estimates: productive finite verb morphology composite (FVMC).

| Parameter                                       | Term          | Model A<br><i>UM</i> | Model B1<br><i>UG-Ln:<br/>Fixed</i> | Model B2<br><i>UG-Ln:<br/>Random</i> | Model C1<br><i>UG-Qd:<br/>Fixed</i> | <b>Model C2<br/><i>UG-Qd:<br/>Linear<br/>random</i></b> | Model C3<br><i>UG-Qd:<br/>Quadratic<br/>random</i> | Model C4<br><i>UG-Qd:<br/>Random</i> |
|-------------------------------------------------|---------------|----------------------|-------------------------------------|--------------------------------------|-------------------------------------|---------------------------------------------------------|----------------------------------------------------|--------------------------------------|
| <i>Fixed effects: <math>\gamma</math></i>       |               |                      |                                     |                                      |                                     |                                                         |                                                    |                                      |
| Intercept                                       | $\gamma_{00}$ | .784***              | .668***                             | NC                                   | .655***                             | <b>.646***</b>                                          | NC                                                 | NC                                   |
| Linear slope                                    | $\gamma_{10}$ |                      | .073***                             | NC                                   | .108**                              | <b>.115**</b>                                           | NC                                                 | NC                                   |
| Quadratic slope                                 | $\gamma_{20}$ |                      |                                     | NC                                   | -.011                               | <b>-.013</b>                                            | NC                                                 | NC                                   |
| <i>Variance components: <math>\sigma</math></i> |               |                      |                                     |                                      |                                     |                                                         |                                                    |                                      |
| L1: Within-person variance                      | $\sigma_e^2$  | .025***              | .017***                             | NC                                   | .017***                             | <b>.013***</b>                                          | NC                                                 | NC                                   |
| L2: B/w-person intercept                        | $\sigma_0^2$  | .008**               | .010**                              | NC                                   | .010**                              | <b>.033**</b>                                           | NC                                                 | NC                                   |
| L2: B/w-person linear slope                     | $\sigma_1^2$  |                      |                                     | NC                                   |                                     | <b>.002</b>                                             | NC                                                 | NC                                   |
| L2: B/w-person quadratic slope                  | $\sigma_2^2$  |                      |                                     | NC                                   |                                     |                                                         | NC                                                 | NC                                   |
| Covariance ( $\sigma_0^2, \sigma_1^2$ )         | $\sigma_{01}$ |                      |                                     | NC                                   |                                     | <b>-.008*</b>                                           | NC                                                 | NC                                   |
| Covariance ( $\sigma_0^2, \sigma_2^2$ )         | $\sigma_{02}$ |                      |                                     | NC                                   |                                     |                                                         | NC                                                 | NC                                   |
| Covariance ( $\sigma_1^2, \sigma_2^2$ )         | $\sigma_{12}$ |                      |                                     | NC                                   |                                     |                                                         | NC                                                 | NC                                   |

| Parameter                            | Term    | Model A<br><i>UM</i> | Model B1<br><i>UG-Ln:<br/>Fixed</i> | Model B2<br><i>UG-Ln:<br/>Random</i> | Model C1<br><i>UG-Qd:<br/>Fixed</i> | <b>Model C2<br/><i>UG-Qd:<br/>Linear<br/>random</i></b> | Model C3<br><i>UG-Qd:<br/>Quadratic<br/>random</i> | Model C4<br><i>UG-Qd:<br/>Random</i> |
|--------------------------------------|---------|----------------------|-------------------------------------|--------------------------------------|-------------------------------------|---------------------------------------------------------|----------------------------------------------------|--------------------------------------|
| <i>Proportion variance reduction</i> |         |                      |                                     |                                      |                                     |                                                         |                                                    |                                      |
| L1: Within-person variance           | $R_e^2$ |                      | 32%                                 | NC                                   | 32%                                 | <b>48%</b>                                              | NC                                                 | NC                                   |
| <i>Goodness-of-fit</i>               |         |                      |                                     |                                      |                                     |                                                         |                                                    |                                      |
|                                      | -2LL    | -87.4                | -129.1***                           | NC                                   | -130.2                              | <b>-145.7**</b>                                         | NC                                                 | NC                                   |

*Note.* UM = unconditional means; UG = unconditional growth; Ln = linear; Qd = quadratic; NC = nonconverging model; L1 = Level-1 variance; L2 = Level-2 variance; B/w-person = between-person; -2LL = -2 log-likelihood deviance statistic.

\* $p < .05$ . \*\* $p < .01$ . \*\*\* $p < .001$ .
