# Supplementary material
Source: publisher figshare collection journal article supplement (https://asha.figshare.com/articles/dataset/_/5176942)
Supplement: Supplementary file 6 [file 1]

**Supplemental Material S2.** Growth curve model parameter estimates: adapted finite verb morphology composite (FVMC).

| Parameter                                       | Term                  | Model A<br><i>UM</i> | Model B1<br><i>UG-Ln:<br/>Fixed</i> | Model B2<br><i>UG-Ln:<br/>Random</i> | Model C1<br><i>UG-Qd:<br/>Fixed</i> | <b>Model C2</b><br><b><i>UG-Qd:<br/>Linear<br/>random</i></b> | Model C3<br><i>UG-Qd:<br/>Quadratic<br/>random</i> | Model C4<br><i>UG-Qd:<br/>Random</i> |
|-------------------------------------------------|-----------------------|----------------------|-------------------------------------|--------------------------------------|-------------------------------------|---------------------------------------------------------------|----------------------------------------------------|--------------------------------------|
| <i>Fixed effects: <math>\gamma</math></i>       |                       |                      |                                     |                                      |                                     |                                                               |                                                    |                                      |
| Intercept                                       | $\gamma_{00}$         | .743***              | .632***                             | .626***                              | .611***                             | <b>.601***</b>                                                | NC                                                 | NC                                   |
| Linear slope                                    | $\gamma_{10}$         |                      | .070***                             | .072***                              | .124***                             | <b>.132***</b>                                                | NC                                                 | NC                                   |
| Quadratic slope                                 | $\gamma_{20}$         |                      |                                     |                                      | -.017                               | <b>-.019*</b>                                                 | NC                                                 | NC                                   |
| <i>Variance components: <math>\sigma</math></i> |                       |                      |                                     |                                      |                                     |                                                               |                                                    |                                      |
| L1: Within-person variance                      | $\sigma_{\epsilon}^2$ | .024***              | .016***                             | .012***                              | .015***                             | <b>.011***</b>                                                | NC                                                 | NC                                   |
| L2: B/w-person intercept                        | $\sigma_0^2$          | .007*                | .009**                              | .026**                               | .009**                              | <b>.027**</b>                                                 | NC                                                 | NC                                   |
| L2: B/w-person linear slope                     | $\sigma_1^2$          |                      |                                     | .002                                 |                                     | <b>.002</b>                                                   | NC                                                 | NC                                   |
| L2: B/w-person quadratic slope                  | $\sigma_2^2$          |                      |                                     |                                      |                                     |                                                               |                                                    |                                      |
| Covariance ( $\sigma_0^2, \sigma_1^2$ )         | $\sigma_{01}$         |                      |                                     | -.007*                               |                                     | <b>-.007*</b>                                                 | NC                                                 | NC                                   |
| Covariance ( $\sigma_0^2, \sigma_2^2$ )         | $\sigma_{02}$         |                      |                                     |                                      |                                     |                                                               | NC                                                 | NC                                   |
| Covariance ( $\sigma_1^2, \sigma_2^2$ )         | $\sigma_{12}$         |                      |                                     |                                      |                                     |                                                               | NC                                                 | NC                                   |

| Parameter                            | Term             | Model A<br><i>UM</i> | Model B1<br><i>UG-Ln:<br/>Fixed</i> | Model B2<br><i>UG-Ln:<br/>Random</i> | Model C1<br><i>UG-Qd:<br/>Fixed</i> | <b>Model C2</b><br><b><i>UG-Qd:<br/>Linear<br/>random</i></b> | Model C3<br><i>UG-Qd:<br/>Quadratic<br/>random</i> | Model C4<br><i>UG-Qd:<br/>Random</i> |
|--------------------------------------|------------------|----------------------|-------------------------------------|--------------------------------------|-------------------------------------|---------------------------------------------------------------|----------------------------------------------------|--------------------------------------|
| <i>Proportion variance reduction</i> |                  |                      |                                     |                                      |                                     |                                                               |                                                    |                                      |
| L1: Within-person variance           | $R_{\epsilon}^2$ |                      | 33%                                 | 50%                                  | 38%                                 | <b>54%</b>                                                    | NC                                                 | NC                                   |
| <i>Goodness-of-fit</i>               |                  |                      |                                     |                                      |                                     |                                                               |                                                    |                                      |
| -2LL                                 |                  | -97.7                | -138.7***                           | -148**                               | -141.4                              | <b>-151.9**</b>                                               | NC                                                 | NC                                   |

*Note.* UM = unconditional means; UG = unconditional growth; Ln = linear; Qd = quadratic; NC = nonconverging model; L1= Level-1 variance; L2 = Level-2 variance; B/w-person = between-person; -2LL = -2 log-likelihood deviance statistic.

\* $p < .05$ . \*\* $p < .01$ . \*\*\* $p < .001$ .
