# Supplementary material
Source: publisher figshare collection journal article supplement (https://asha.figshare.com/articles/dataset/_/5176942)
Supplement: Supplementary file 7 [file 1]

**Supplemental Material S1.** Growth curve model parameter estimates: finite verb morphology composite (FVMC).

| Parameter                                       | Term                  | Model A<br><i>UM</i> | Model B1<br><i>UG-Ln:<br/>Fixed</i> | Model B2<br><i>UG-Ln:<br/>Random</i> | Model C1<br><i>UG-Qd:<br/>Fixed</i> | Model C2<br><i>UG-Qd:<br/>Linear<br/>random</i> | Model C3<br><i>UG-Qd:<br/>Quadratic<br/>random</i> | <b>Model C4<br/><i>UG-Qd:<br/>Random</i></b> |
|-------------------------------------------------|-----------------------|----------------------|-------------------------------------|--------------------------------------|-------------------------------------|-------------------------------------------------|----------------------------------------------------|----------------------------------------------|
| <i>Fixed effects: <math>\gamma</math></i>       |                       |                      |                                     |                                      |                                     |                                                 |                                                    |                                              |
| Intercept                                       | $\gamma_{00}$         | .776***              | .652***                             | .642***                              | .626***                             | .606***                                         | .615***                                            | <b>.600***</b>                               |
| Linear slope                                    | $\gamma_{10}$         |                      | .077***                             | .082***                              | .146**                              | .166***                                         | .156***                                            | <b>.171**</b>                                |
| Quadratic slope                                 | $\gamma_{20}$         |                      |                                     |                                      | -.022                               | -.027*                                          | -.024                                              | <b>-.028*</b>                                |
| <i>Variance components: <math>\sigma</math></i> |                       |                      |                                     |                                      |                                     |                                                 |                                                    |                                              |
| L1: Within-person variance                      | $\sigma_{\epsilon}^2$ | .033***              | .024***                             | .017***                              | .023***                             | .015***                                         | .019***                                            | <b>.009***</b>                               |
| L2: B/w-person intercept                        | $\sigma_0^2$          | .007                 | .009**                              | .034**                               | .010**                              | .039**                                          | .024**                                             | <b>.052**</b>                                |
| L2: B/w-person linear slope                     | $\sigma_1^2$          |                      |                                     | .004                                 |                                     | .005*                                           |                                                    | <b>.047**</b>                                |
| L2: B/w-person quadratic slope                  | $\sigma_2^2$          |                      |                                     |                                      |                                     |                                                 | .0002                                              | <b>.003*</b>                                 |
| Covariance ( $\sigma_0^2, \sigma_1^2$ )         | $\sigma_{01}$         |                      |                                     | -.010*                               |                                     | -.012*                                          |                                                    | <b>-.032*</b>                                |
| Covariance ( $\sigma_0^2, \sigma_2^2$ )         | $\sigma_{02}$         |                      |                                     |                                      |                                     |                                                 | -.002                                              | <b>.005</b>                                  |
| Covariance ( $\sigma_1^2, \sigma_2^2$ )         | $\sigma_{12}$         |                      |                                     |                                      |                                     |                                                 |                                                    | <b>-.011*</b>                                |

| Parameter                              | Term             | Model A<br><i>UM</i> | Model B1<br><i>UG-Ln:<br/>Fixed</i> | Model B2<br><i>UG-Ln:<br/>Random</i> | Model C1<br><i>UG-Qd:<br/>Fixed</i> | Model C2<br><i>UG-Qd:<br/>Linear<br/>random</i> | Model C3<br><i>UG-Qd:<br/>Quadratic<br/>random</i> | <b>Model C4<br/><i>UG-Qd:<br/>Random</i></b> |
|----------------------------------------|------------------|----------------------|-------------------------------------|--------------------------------------|-------------------------------------|-------------------------------------------------|----------------------------------------------------|----------------------------------------------|
| <i>Proportional variance reduction</i> |                  |                      |                                     |                                      |                                     |                                                 |                                                    |                                              |
| L1: Within-person variance             | $R_{\epsilon}^2$ |                      | 27%                                 | 48%                                  | 30%                                 | 55%                                             | 42%                                                | <b>73%</b>                                   |
| <i>Goodness-of-fit</i>                 |                  |                      |                                     |                                      |                                     |                                                 |                                                    |                                              |
| -2LL                                   |                  | -57.6                | -92.6***                            | -102.01**                            | -95.5                               | -107.5**                                        | -103.5*                                            | <b>-121.7***</b>                             |

*Note.* UM = unconditional means; UG = unconditional growth; Ln = linear; Qd = quadratic; L1 = Level-1 variance; L2 = Level-2 variance; B/w-person = between-person; -2LL = -2 log-likelihood deviance statistic.

\* $p < .05$ . \*\* $p < .01$ . \*\*\* $p < .001$ .
